# Supplementary material for: Antiprotozoal activity of dehydroabietic acid derivatives against Leishmania donovani and Trypanosoma cruzi
Source: Royal Society of Chemistry journal article supplement (doi:10.1039/c5md00498e), 2015-11-25
Supplement: c5md00498e1.pdf [file c5md00498e1.pdf]

# Antiprotozoal activity of dehydroabietic acid derivatives against *Leishmania donovani* and *Trypanosoma cruzi*

Mikko Vahermo,<sup>a</sup> Sara Krogerus,<sup>a</sup> Abdelmajeed Nasereddin,<sup>b</sup> Marcel Kaiser,<sup>c</sup> Reto Brun,<sup>c</sup> Charles L. Jaffe,<sup>b</sup> Jari Yli-Kauhaluoma,<sup>a</sup> Vânia M. Moreira<sup>a,\*</sup>

<sup>a</sup>Division of Pharmaceutical Chemistry and Technology, Faculty of Pharmacy, P. O. Box 56, Viikinkaari 5 E, FI-00014 University of Helsinki, Finland. vania.moreira@helsinki.fi

<sup>b</sup>Department of Microbiology and Molecular Genetics, IMRIC, P. O. Box 12272, Hebrew University-Hadassah Medical School, 9112102 Jerusalem, Israel.

<sup>c</sup>Department of Medical Parasitology and Infection Biology, Swiss Tropical and Public Health Institute, Socinstrasse 57, 4051 Basel, Switzerland.

## Supplementary Information

### Table of Contents

|                                                                                                                                  |   |
|----------------------------------------------------------------------------------------------------------------------------------|---|
| Compound spectra.....                                                                                                            | 2 |
| <sup>1</sup> H-NMR spectrum of compound <b>17</b> in CDCl <sub>3</sub> .....                                                     | 2 |
| <sup>13</sup> C-NMR spectrum of compound <b>17</b> in CDCl <sub>3</sub> .....                                                    | 2 |
| <sup>1</sup> H-NMR spectrum of compound <b>29</b> in DMSO- <i>d</i> <sub>6</sub> .....                                           | 3 |
| <sup>13</sup> C-NMR spectrum of compound <b>29</b> in DMSO- <i>d</i> <sub>6</sub> .....                                          | 3 |
| Table 1. Calculated Lipinski parameters and drug scores of compounds <b>13-16</b> , <b>19</b> , <b>23-26</b> and <b>28</b> ..... | 4 |
| Table 2. Predicted toxicity of compounds <b>13-16</b> , <b>19</b> , <b>23-26</b> and <b>28</b> .....                             | 4 |
| References.....                                                                                                                  | 5 |

Compound spectra

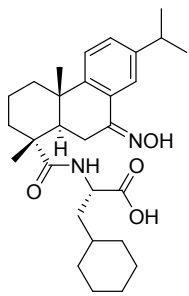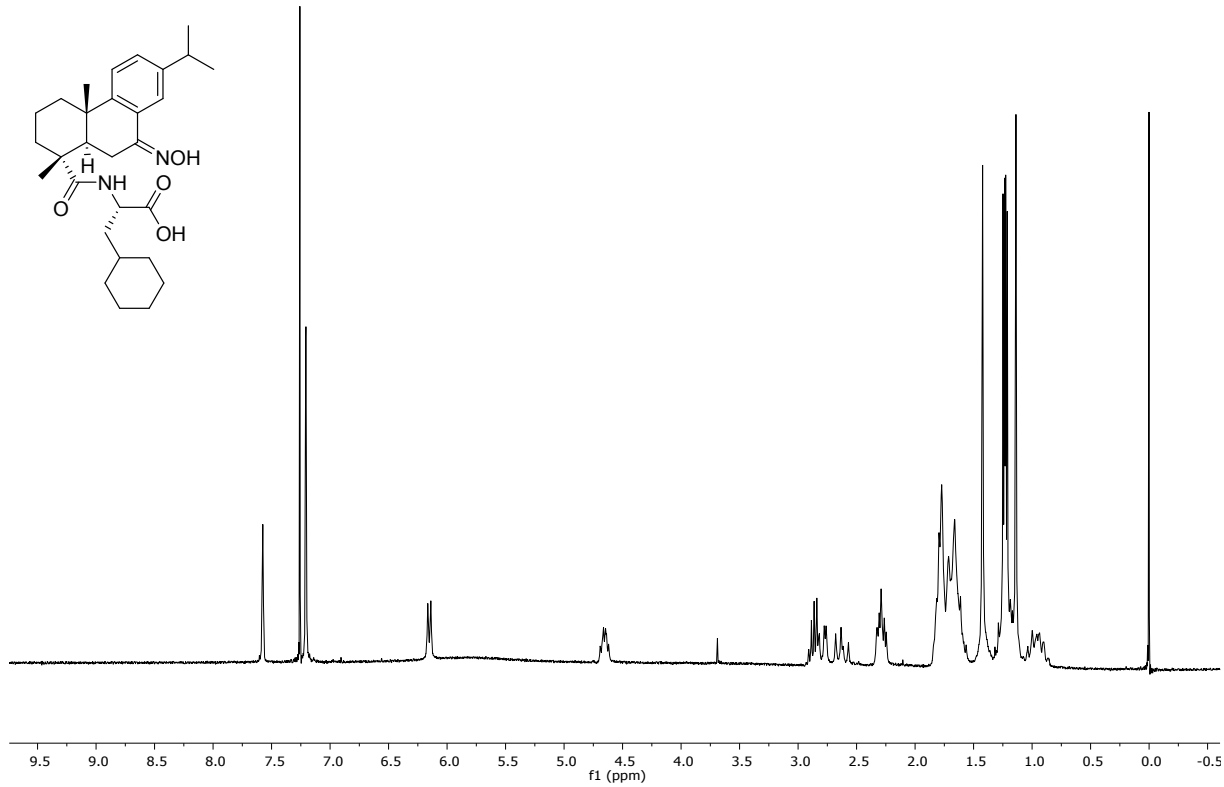

<sup>1</sup>H-NMR spectrum of compound **17** in CDCl<sub>3</sub>.

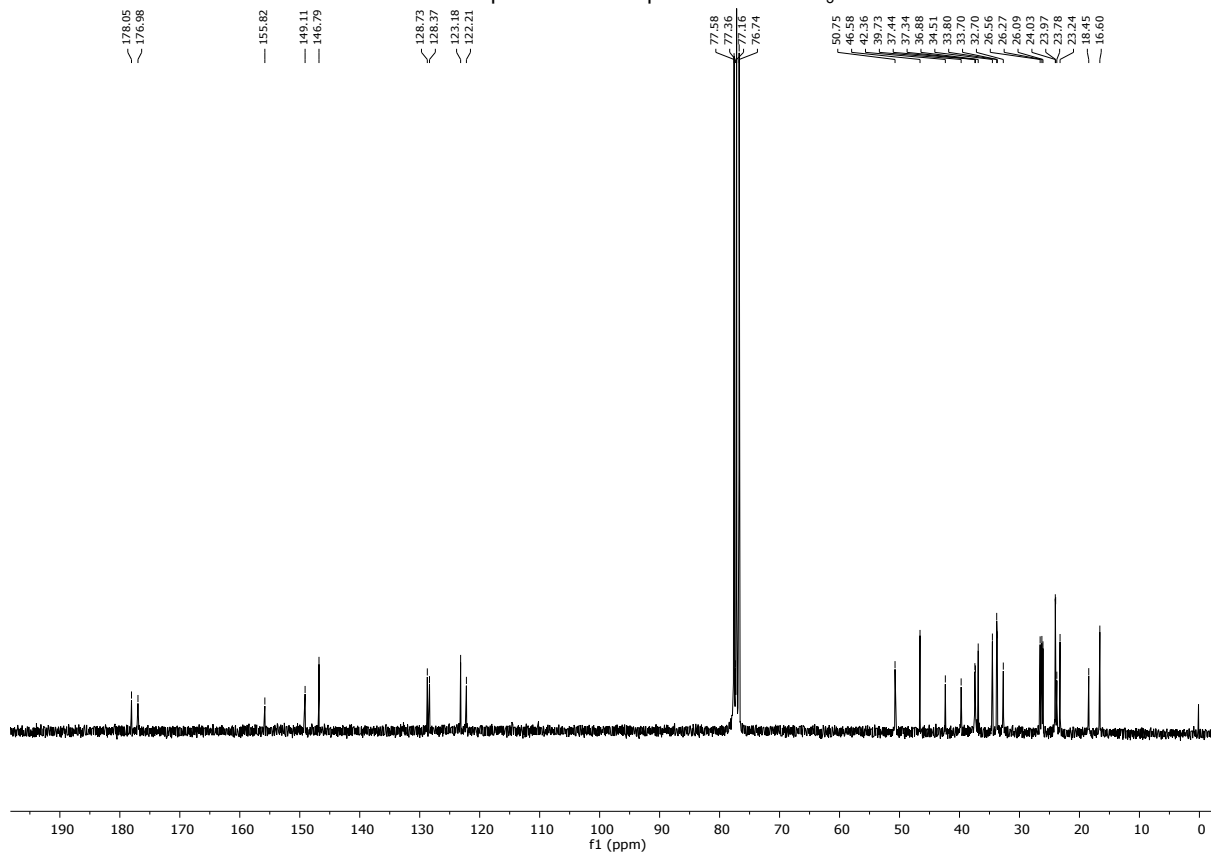

<sup>13</sup>C-NMR spectrum of compound **17** in CDCl<sub>3</sub>.

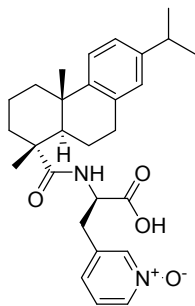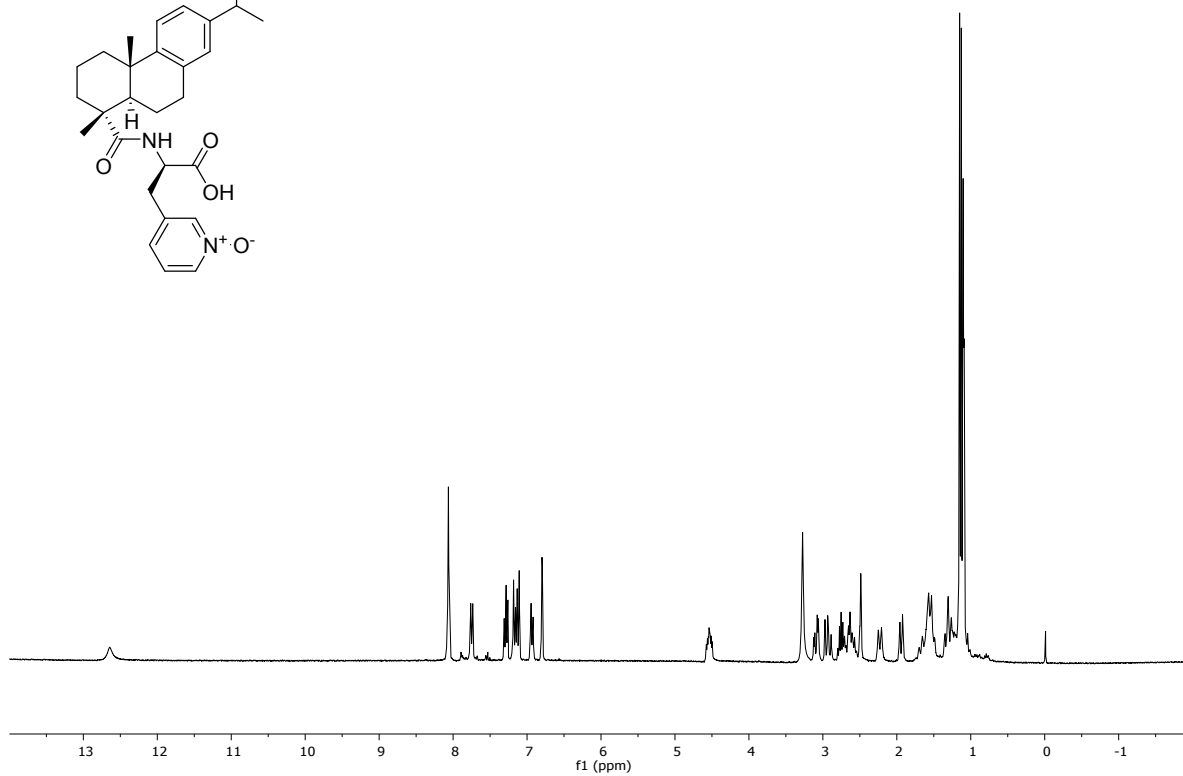

$^1\text{H-NMR}$  spectrum of compound **29** in  $\text{DMSO-}d_6$ .

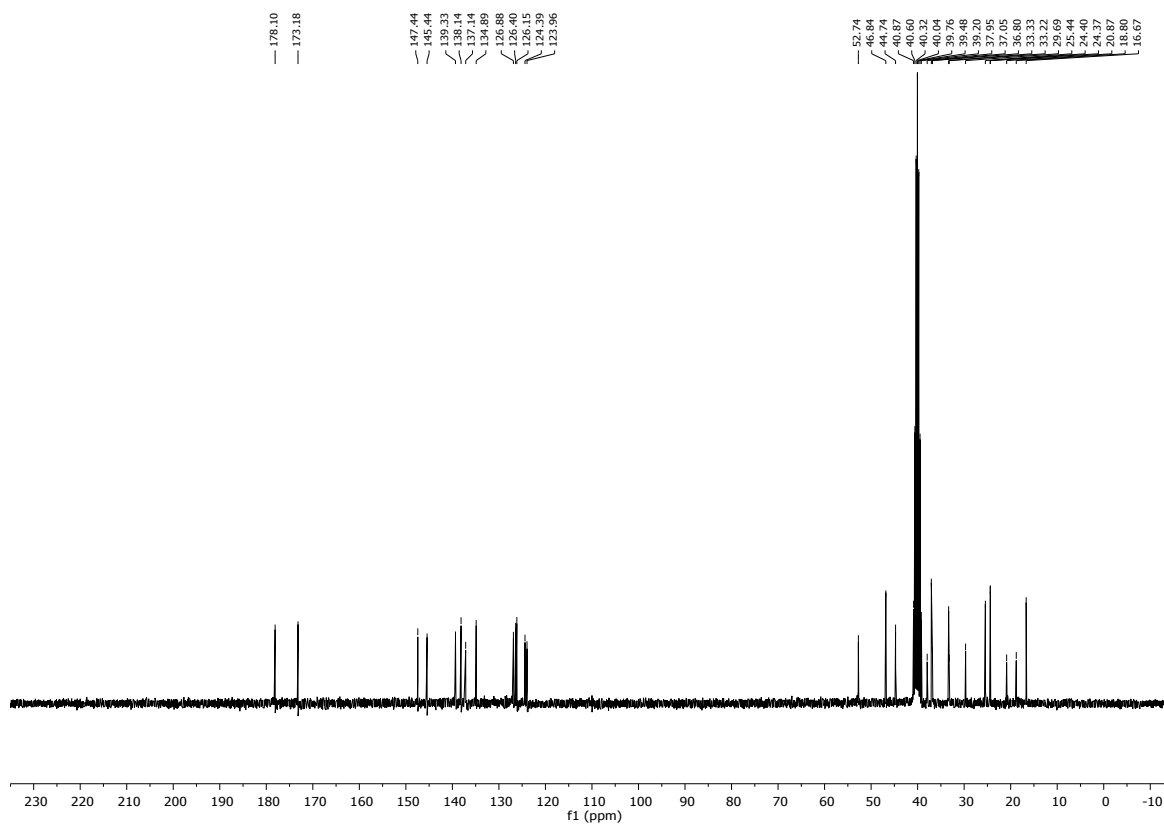

$^{13}\text{C-NMR}$  spectrum of compound **29** in  $\text{DMSO-}d_6$ .

**Table 1.** Calculated Lipinski parameters and drug scores of compounds **13-16, 19, 23-26** and **28**.<sup>1,2</sup>

| <b>Compound</b>         | <b>MW<sup>a</sup></b> | <b>logP<sup>b</sup></b> | <b>HBAs<sup>c</sup></b> | <b>HBDs<sup>d</sup></b> | <b>Drug score</b> |
|-------------------------|-----------------------|-------------------------|-------------------------|-------------------------|-------------------|
| <b>Rule<sup>3</sup></b> | <b>≤ 500</b>          | <b>≤ 5</b>              | <b>≤ 10</b>             | <b>≤ 5</b>              | <b>--</b>         |
| <b>13</b>               | 453                   | 6.25                    | 3                       | 2                       | 0.16              |
| <b>14</b>               | 467                   | 6.55                    | 2                       | 1                       | 0.15              |
| <b>15</b>               | 467                   | 5.19                    | 4                       | 2                       | 0.17              |
| <b>16</b>               | 496                   | 5.19                    | 4                       | 2                       | 0.14              |
| <b>19</b>               | 447                   | 6.32                    | 3                       | 2                       | 0.18              |
| <b>23</b>               | 447                   | 6.32                    | 3                       | 2                       | 0.18              |
| <b>24</b>               | 462                   | 5.04                    | 3                       | 1                       | 0.33              |
| <b>25</b>               | 448                   | 5.01                    | 4                       | 2                       | 0.24              |
| <b>26</b>               | 477                   | 6.07                    | 3                       | 2                       | 0.23              |
| <b>28</b>               | 478                   | 3.50                    | 3                       | 1                       | 0.20              |

<sup>a</sup>MW: molecular weight

<sup>b</sup>log *P*: logarithm of partition coefficient between *n*-octanol and water

<sup>c</sup>HBA: hydrogen bond acceptor

<sup>d</sup>HBD: hydrogen bond donor

**Table 2.** Predicted toxicity of compounds **13-16, 19, 23-26** and **28** (1 = safe).<sup>1</sup>

| <b>Compound</b> | <b>Mutagenic</b> | <b>Tumorigenic</b> | <b>Irritant</b> | <b>Reproductive Effect</b> |
|-----------------|------------------|--------------------|-----------------|----------------------------|
| <b>13</b>       | 1                | 1                  | 1               | 1                          |
| <b>14</b>       | 1                | 1                  | 1               | 1                          |
| <b>15</b>       | 1                | 1                  | 1               | 1                          |
| <b>16</b>       | 1                | 1                  | 1               | 1                          |
| <b>19</b>       | 1                | 1                  | 1               | 1                          |
| <b>23</b>       | 1                | 1                  | 1               | 1                          |
| <b>24</b>       | 1                | 1                  | 1               | 1                          |
| <b>25</b>       | 1                | 1                  | 1               | 1                          |
| <b>26</b>       | 1                | 1                  | 1               | 1                          |
| <b>28</b>       | 1                | 1                  | 1               | 1                          |

## References

1. OSIRIS Property Explorer. Available online from: <http://www.organicchemistry.org/prog/peo/>.
2. Marvin Sketch 6.3.0. Available online from: <http://www.chemaxon.com/products/marvin/marvinsketch>.
3. P. Lesson, *Nature*, 2012, **481**, 455-456.
